# Supplementary material
Source: PubMed Central journal article supplement (PMC7015061)

**Fig. S1**

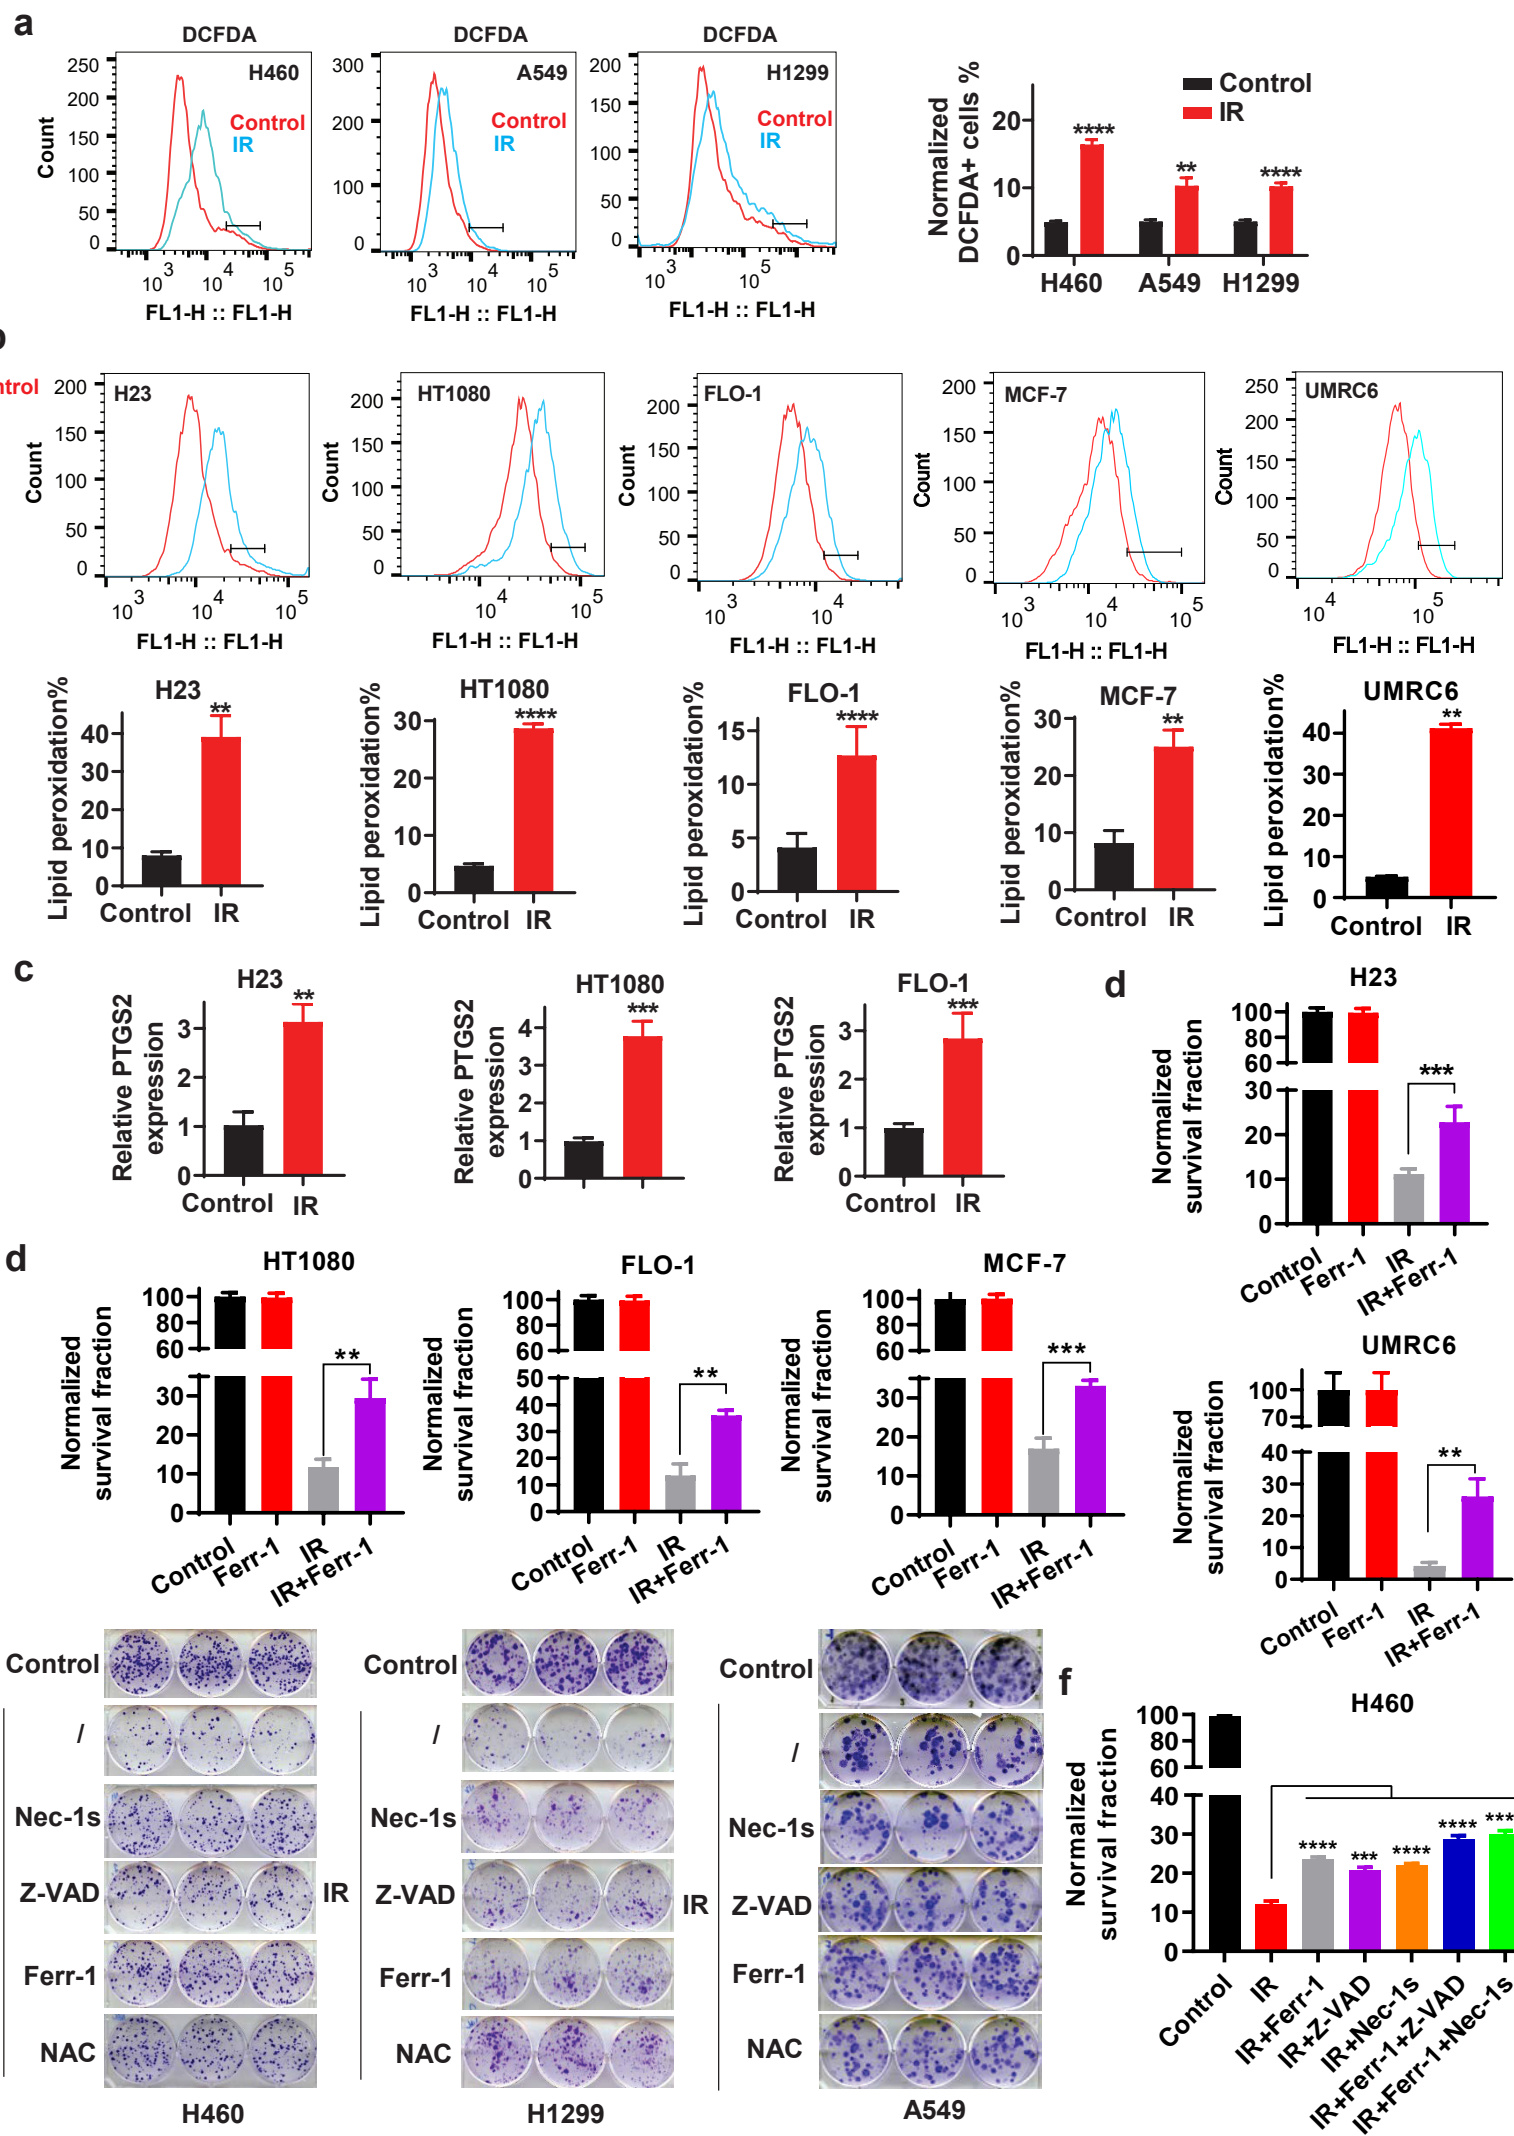

## SUPPLEMENTARY FIGURE LEGENDS

### **Supplementary Figure 1. Ionizing radiation induces ferroptosis in cancer cells.**

**a** Total ROS levels assessment in H460, A549, and H1299 cell lines at 24 h after exposure to 6 Gy of ionizing radiation. Bar graph showing relative levels of total ROS by DCFDA staining in the indicated cells. Error bars are mean  $\pm$  SD,  $n = 3$  independent repeats. *P* values calculated using two-tailed unpaired Student *t* test.

**b** Lipid peroxidation assessment in H23, HT1080, FLO-1, MCF-7 and UMRC6 cell lines at 24 h after exposure to 6 Gy of ionizing radiation. Bar graph showing relative levels of lipid peroxidation by C11-BODIPY staining in the indicated cells. Error bars are mean  $\pm$  SD,  $n = 3$  independent repeats. *P* values calculated using two-tailed unpaired Student *t* test.

**c** qRT-PCR analysis of *PTGS2* expression in H23, HT1080, and FLO-1 cell lines at 24 h after exposure to 6 Gy of ionizing radiation. Error bars are mean  $\pm$  SD,  $n = 3$  independent repeats. *P* values calculated using two-tailed unpaired Student *t* test.

**d** Clonogenic survival assay in H23, HT1080, FLO-1, MCF-7 and UMRC6 cell lines that were pretreated with 5  $\mu$ M ferrostatin-1 or DMSO for 24 h followed by exposure to ionizing radiation at a dose of 6 Gy. The survival data were normalized to those of unirradiated control cells. Error bars are mean  $\pm$  SD,  $n = 3$  independent repeats. *P* values calculated using two-tailed unpaired Student *t* test.

**e** Representative images of clonogenic survival assays in H460, A549, and H1299 cell lines that were pretreated with 2  $\mu$ M necrostatin-1s, 5  $\mu$ M Z-VAD-fmk, 5  $\mu$ M ferrostatin-1, 5 mM N-acetyl-L-cysteine, or DMSO for 24 h followed by exposure to ionizing radiation at a dose of 6 Gy.

**f** Clonogenic survival assay in H460 cell line that were pretreated with 5  $\mu$ M ferrostatin-1, 5  $\mu$ M

Z-VAD-fmk, 2  $\mu$ M necrostatin-1s, 5  $\mu$ M ferrostatin-1 plus 5  $\mu$ M Z-VAD-fmk, 5  $\mu$ M ferrostatin-1 plus 2  $\mu$ M necrostatin-1s or DMSO for 24 h followed by exposure to 4 Gy of ionizing radiation. The survival data were normalized to those of unirradiated control cells. Error bars are mean  $\pm$  SD, n = 3 independent repeats. *P* values calculated using two-tailed unpaired Student *t* test.

**Supplementary Figure 2. ACSL4 deficiency does not significantly affect IR-induced total ROS.**

**a** qRT-PCR analysis of *ACSL4*, *SLC7A11*, and *GPX4* expression in H460 cell line at 0.5, 2, 6 or 24 h after exposure to 6 Gy of ionizing radiation. Error bars are mean  $\pm$  SD, n = 3 independent repeats. *P* values calculated using two-tailed unpaired Student *t* test.

**b-c** Total ROS levels assessment in sg Control (sg C), sg ACSL4-2, and sg ACSL4-3 A549 (b) and H460 (c) cell lines at 24 h after exposure to 6 Gy of ionizing radiation. Bar graph showing IR-induced relative fold changes of total ROS by DCFDA staining in the indicated cells. Error bars are mean  $\pm$  SD, n = 3 independent repeats. *P* values calculated using two-tailed unpaired Student *t* test.

**d** Western blotting analysis of ACSL4 expression in sh Control (sh C), sh ACSL4 H460 cell lines at 24h after exposure to 6 Gy of ionizing radiation or no radiation.

**e** Cell viability measurements in sh C, sh ACSL4 H460 cell lines treated with or without 10  $\mu$ M erastin for 24 h. Error bars are mean  $\pm$  SD, n = 3 independent repeats. *P* values calculated using two-tailed unpaired Student test.

**f** Clonogenic survival assay in sh C, sh ACSL4 H460 cell lines that were pretreated with 5  $\mu$ M ferrostatin-1 or DMSO for 24 h followed by exposure to 6 Gy of ionizing radiation. The survival data were normalized to those of unirradiated control cells. Error bars are mean  $\pm$  SD, n = 3

independent repeats. *P* values calculated using two-tailed unpaired Student *t* test.

**Supplementary Figure 3. SLC7A11 and GPX4 promote radioresistance largely through inhibiting ferroptosis.**

**a** Western blotting analysis of GPX4 expression in UMRC6 cells with stable expression of empty vector (EV) and GPX4.

**b** Lipid peroxidation assessment in EV- and GPX4-expressing UMRC6 cells at 24 h after exposure to 6 Gy of ionizing radiation. Bar graph showing relative levels of lipid peroxidation by C11-BODIPY staining in the indicated cells. Error bars are mean  $\pm$  SD, *n* = 3 independent repeats. *P* values calculated using two-tailed unpaired Student *t* test.

**c** Clonogenic survival assay in EV- and GPX4-expressing UMRC6 cells that were pretreated with 5  $\mu$ M ferrostatin-1 or DMSO for 24 h followed by exposure to ionizing radiation at a dose of 6 Gy. Error bars are mean  $\pm$  SD, *n* = 3 independent repeats. *P* values calculated using two-tailed unpaired Student *t* test.

**d** Box plot showing a comparison of SLC7A11 expression in *KEAP1* wild-type (WT) and mutant lung cancers derived from TCGA data sets.

**e** Western blotting analysis of KEAP1 and SLC7A11 expression in sg Control (sg C), sg KEAP1-1, and sg KEAP1-2 H1299 cell lines.

**f** Lipid peroxidation assessment in sg C and sg KEAP1-1 H1299 cells at 24 h after exposure to 6 Gy of ionizing radiation. Bar graph showing IR-induced relative fold changes of lipid peroxidation by C11-BODIPY staining in the indicated cells. Error bars are mean  $\pm$  SD, *n* = 3 independent repeats. *P* values calculated using two-tailed unpaired Student *t* test.

**g** qRT-PCR analysis of *PTGS2* expression in sg C and sg KEAP1-1 H1299 cell lines at 24 h after

exposure to 6 Gy of ionizing radiation. Error bars are mean  $\pm$  SD, n = 3 independent repeats. *P* values calculated using two-tailed unpaired Student *t* test.

**h** Clonogenic survival assays in sg C and sg KEAP1-1 H1299 cells that were pretreated with 5  $\mu$ M ferrostatin-1 or DMSO for 24 h followed by exposure to 6 Gy of ionizing radiation. Error bars are mean  $\pm$  SD, n = 3 independent repeats. *P* values calculated using two-tailed unpaired Student *t* test.

**i** Western blotting analysis of KEAP1 and SLC7A11 expression in sg C, sg KEAP1-1, and sg KEAP1-2 H23 cell lines.

**j** Lipid peroxidation assessment in sg C, sg KEAP1-1, and sg KEAP1-2 H23 cells at 24 h after exposure to 2 Gy of ionizing radiation. Bar graph showing IR-induced relative fold changes of lipid peroxidation by C11-BODIPY staining in the indicated cells. Error bars are mean  $\pm$  SD, n = 3 independent repeats. *P* values calculated using two-tailed unpaired Student *t* test.

**k** qRT-PCR analysis of *PTGS2* expression in sg C, sg KEAP1-1, and sg KEAP1-2 H23 cell lines at 24 h after exposure to 2 Gy of ionizing radiation. Error bars are mean  $\pm$  SD, n = 3 independent repeats. *P* values calculated using two-tailed unpaired Student *t* test.

**l** Clonogenic survival assays in sg C, sg KEAP1-1, and sg KEAP1-2 H23 cells that were pretreated with 5  $\mu$ M ferrostatin-1 or DMSO for 24 h followed by exposure to 2 Gy of ionizing radiation. Error bars are mean  $\pm$  SD, n = 3 independent repeats. *P* values calculated using two-tailed unpaired Student *t* test.

**Supplementary Figure 4. GPX4 overexpression does not affect IR-induced formation of phosphorylated H2AX foci.**

**a** Representative immunofluorescence images showing staining of phospho-H2AX foci (red) and

nuclei counterstained with DAPI (blue) in the indicated cells with or without exposure to IR.

**b** The numbers of phospho-H2AX foci per nucleus were counted on the basis of immunofluorescence at 30 min and 24 h after exposure to 6 Gy of ionizing radiation in UMRC6 cells with stable expression of EV and GPX4. Error bars are mean  $\pm$  SD, n = 50 independent repeats. *P* values calculated using two-tailed unpaired Student *t* test.

**c** The numbers of phospho-H2AX foci per nucleus were counted on the basis of immunofluorescence at 30 min and 24 h after exposure to 6 Gy of ionizing radiation in sg C, sg KEAP1-2 H1299 cell lines. Error bars are mean  $\pm$  SD, n = 10 independent repeats. *P* values calculated using two-tailed unpaired Student *t* test.

**d** Representative immunofluorescence images showing staining of phospho-H2AX foci (red) and nuclei counterstained with DAPI (blue) in the indicated cells with or without exposure to IR.

### **Supplementary Figure 5. Treatment combination analysis of IR and various FINs.**

**a** The Fa-CI plot (Chou-Talalay plot) showing synergistic effects (CI value < 1) of IR with erastin, sulfasalazine (SAS), RSL3, ML162, and FIN56 in A549 cells. The dots shown on the plot represent the treatment combination data.

**b** Lipid peroxidation assessment in H460 cells pretreated with DMSO, 500 mM sulfasalazine, 10  $\mu$ M RSL3, 10  $\mu$ M ML162, or 10  $\mu$ M FIN56 for 24 h followed by exposure to 4 Gy of ionizing radiation.

**c** Bar graphs showing relative levels of lipid peroxidation by C11-BODIPY staining in the indicated cells. Error bars are mean  $\pm$  SD, n = 3 independent repeats. *P* values calculated using two-tailed unpaired Student *t* test.

**d** qRT-PCR analysis of *PTGS2* expression in H460 cells pretreated with DMSO, 500 mM

## SUPPLEMENTARY FIGURE LEGENDS

### **Supplementary Figure 1. Ionizing radiation induces ferroptosis in cancer cells.**

**a** Total ROS levels assessment in H460, A549, and H1299 cell lines at 24 h after exposure to 6 Gy of ionizing radiation. Bar graph showing relative levels of total ROS by DCFDA staining in the indicated cells. Error bars are mean  $\pm$  SD, n = 3 independent repeats. *P* values calculated using two-tailed unpaired Student *t* test.

**b** Lipid peroxidation assessment in H23, HT1080, FLO-1, MCF-7 and UMRC6 cell lines at 24 h after exposure to 6 Gy of ionizing radiation. Bar graph showing relative levels of lipid peroxidation by C11-BODIPY staining in the indicated cells. Error bars are mean  $\pm$  SD, n = 3 independent repeats. *P* values calculated using two-tailed unpaired Student *t* test.

**c** qRT-PCR analysis of *PTGS2* expression in H23, HT1080, and FLO-1 cell lines at 24 h after exposure to 6 Gy of ionizing radiation. Error bars are mean  $\pm$  SD, n = 3 independent repeats. *P* values calculated using two-tailed unpaired Student *t* test.

**d** Clonogenic survival assay in H23, HT1080, FLO-1, MCF-7 and UMRC6 cell lines that were pretreated with 5  $\mu$ M ferrostatin-1 or DMSO for 24 h followed by exposure to ionizing radiation at a dose of 6 Gy. The survival data were normalized to those of unirradiated control cells. Error bars are mean  $\pm$  SD, n = 3 independent repeats. *P* values calculated using two-tailed unpaired Student *t* test.

**e** Representative images of clonogenic survival assays in H460, A549, and H1299 cell lines that were pretreated with 2  $\mu$ M necrostatin-1s, 5  $\mu$ M Z-VAD-fmk, 5  $\mu$ M ferrostatin-1, 5 mM N-acetyl-L-cysteine, or DMSO for 24 h followed by exposure to ionizing radiation at a dose of 6 Gy.

**f** Clonogenic survival assay in H460 cell line that were pretreated with 5  $\mu$ M ferrostatin-1, 5  $\mu$ M

Z-VAD-fmk, 2  $\mu$ M necrostatin-1s, 5  $\mu$ M ferrostatin-1 plus 5  $\mu$ M Z-VAD-fmk, 5  $\mu$ M ferrostatin-1 plus 2  $\mu$ M necrostatin-1s or DMSO for 24 h followed by exposure to 4 Gy of ionizing radiation. The survival data were normalized to those of unirradiated control cells. Error bars are mean  $\pm$  SD, n = 3 independent repeats. *P* values calculated using two-tailed unpaired Student *t* test.

**Supplementary Figure 2. ACSL4 deficiency does not significantly affect IR-induced total ROS.**

**a** qRT-PCR analysis of *ACSL4*, *SLC7A11*, and *GPX4* expression in H460 cell line at 0.5, 2, 6 or 24 h after exposure to 6 Gy of ionizing radiation. Error bars are mean  $\pm$  SD, n = 3 independent repeats. *P* values calculated using two-tailed unpaired Student *t* test.

**b-c** Total ROS levels assessment in sg Control (sg C), sg ACSL4-2, and sg ACSL4-3 A549 (b) and H460 (c) cell lines at 24 h after exposure to 6 Gy of ionizing radiation. Bar graph showing IR-induced relative fold changes of total ROS by DCFDA staining in the indicated cells. Error bars are mean  $\pm$  SD, n = 3 independent repeats. *P* values calculated using two-tailed unpaired Student *t* test.

**d** Western blotting analysis of ACSL4 expression in sh Control (sh C), sh ACSL4 H460 cell lines at 24h after exposure to 6 Gy of ionizing radiation or no radiation.

**e** Cell viability measurements in sh C, sh ACSL4 H460 cell lines treated with or without 10  $\mu$ M erastin for 24 h. Error bars are mean  $\pm$  SD, n = 3 independent repeats. *P* values calculated using two-tailed unpaired Student test.

**f** Clonogenic survival assay in sh C, sh ACSL4 H460 cell lines that were pretreated with 5  $\mu$ M ferrostatin-1 or DMSO for 24 h followed by exposure to 6 Gy of ionizing radiation. The survival data were normalized to those of unirradiated control cells. Error bars are mean  $\pm$  SD, n = 3



independent repeats. *P* values calculated using two-tailed unpaired Student *t* test.

**Supplementary Figure 3. SLC7A11 and GPX4 promote radioresistance largely through inhibiting ferroptosis.**

**a** Western blotting analysis of GPX4 expression in UMRC6 cells with stable expression of empty vector (EV) and GPX4.

**b** Lipid peroxidation assessment in EV- and GPX4-expressing UMRC6 cells at 24 h after exposure to 6 Gy of ionizing radiation. Bar graph showing relative levels of lipid peroxidation by C11-BODIPY staining in the indicated cells. Error bars are mean  $\pm$  SD, *n* = 3 independent repeats. *P* values calculated using two-tailed unpaired Student *t* test.

**c** Clonogenic survival assay in EV- and GPX4-expressing UMRC6 cells that were pretreated with 5  $\mu$ M ferrostatin-1 or DMSO for 24 h followed by exposure to ionizing radiation at a dose of 6 Gy. Error bars are mean  $\pm$  SD, *n* = 3 independent repeats. *P* values calculated using two-tailed unpaired Student *t* test.

**d** Box plot showing a comparison of SLC7A11 expression in *KEAP1* wild-type (WT) and mutant lung cancers derived from TCGA data sets.

**e** Western blotting analysis of KEAP1 and SLC7A11 expression in sg Control (sg C), sg KEAP1-1, and sg KEAP1-2 H1299 cell lines.

**f** Lipid peroxidation assessment in sg C and sg KEAP1-1 H1299 cells at 24 h after exposure to 6 Gy of ionizing radiation. Bar graph showing IR-induced relative fold changes of lipid peroxidation by C11-BODIPY staining in the indicated cells. Error bars are mean  $\pm$  SD, *n* = 3 independent repeats. *P* values calculated using two-tailed unpaired Student *t* test.

**g** qRT-PCR analysis of *PTGS2* expression in sg C and sg KEAP1-1 H1299 cell lines at 24 h after

exposure to 6 Gy of ionizing radiation. Error bars are mean  $\pm$  SD, n = 3 independent repeats. *P* values calculated using two-tailed unpaired Student *t* test.

**h** Clonogenic survival assays in sg C and sg KEAP1-1 H1299 cells that were pretreated with 5  $\mu$ M ferrostatin-1 or DMSO for 24 h followed by exposure to 6 Gy of ionizing radiation. Error bars are mean  $\pm$  SD, n = 3 independent repeats. *P* values calculated using two-tailed unpaired Student *t* test.

**i** Western blotting analysis of KEAP1 and SLC7A11 expression in sg C, sg KEAP1-1, and sg KEAP1-2 H23 cell lines.

**j** Lipid peroxidation assessment in sg C, sg KEAP1-1, and sg KEAP1-2 H23 cells at 24 h after exposure to 2 Gy of ionizing radiation. Bar graph showing IR-induced relative fold changes of lipid peroxidation by C11-BODIPY staining in the indicated cells. Error bars are mean  $\pm$  SD, n = 3 independent repeats. *P* values calculated using two-tailed unpaired Student *t* test.

**k** qRT-PCR analysis of *PTGS2* expression in sg C, sg KEAP1-1, and sg KEAP1-2 H23 cell lines at 24 h after exposure to 2 Gy of ionizing radiation. Error bars are mean  $\pm$  SD, n = 3 independent repeats. *P* values calculated using two-tailed unpaired Student *t* test.

**l** Clonogenic survival assays in sg C, sg KEAP1-1, and sg KEAP1-2 H23 cells that were pretreated with 5  $\mu$ M ferrostatin-1 or DMSO for 24 h followed by exposure to 2 Gy of ionizing radiation. Error bars are mean  $\pm$  SD, n = 3 independent repeats. *P* values calculated using two-tailed unpaired Student *t* test.

**Supplementary Figure 4. GPX4 overexpression does not affect IR-induced formation of phosphorylated H2AX foci.**

**a** Representative immunofluorescence images showing staining of phospho-H2AX foci (red) and

nuclei counterstained with DAPI (blue) in the indicated cells with or without exposure to IR.

**b** The numbers of phospho-H2AX foci per nucleus were counted on the basis of immunofluorescence at 30 min and 24 h after exposure to 6 Gy of ionizing radiation in UMRC6 cells with stable expression of EV and GPX4. Error bars are mean  $\pm$  SD, n = 50 independent repeats. *P* values calculated using two-tailed unpaired Student *t* test.

**c** The numbers of phospho-H2AX foci per nucleus were counted on the basis of immunofluorescence at 30 min and 24 h after exposure to 6 Gy of ionizing radiation in sg C, sg KEAP1-2 H1299 cell lines. Error bars are mean  $\pm$  SD, n = 10 independent repeats. *P* values calculated using two-tailed unpaired Student *t* test.

**d** Representative immunofluorescence images showing staining of phospho-H2AX foci (red) and nuclei counterstained with DAPI (blue) in the indicated cells with or without exposure to IR.

### **Supplementary Figure 5. Treatment combination analysis of IR and various FINs.**

**a** The Fa-CI plot (Chou-Talalay plot) showing synergistic effects (CI value < 1) of IR with erastin, sulfasalazine (SAS), RSL3, ML162, and FIN56 in A549 cells. The dots shown on the plot represent the treatment combination data.

**b** Lipid peroxidation assessment in H460 cells pretreated with DMSO, 500 mM sulfasalazine, 10  $\mu$ M RSL3, 10  $\mu$ M ML162, or 10  $\mu$ M FIN56 for 24 h followed by exposure to 4 Gy of ionizing radiation.

**c** Bar graphs showing relative levels of lipid peroxidation by C11-BODIPY staining in the indicated cells. Error bars are mean  $\pm$  SD, n = 3 independent repeats. *P* values calculated using two-tailed unpaired Student *t* test.

**d** qRT-PCR analysis of *PTGS2* expression in H460 cells pretreated with DMSO, 500 mM

sulfasalazine, 10  $\mu$ M RSL3, 10  $\mu$ M ML162, or 10  $\mu$ M FIN56 for 24 h followed by exposure to 4 Gy of ionizing radiation. Error bars are mean  $\pm$  SD, n = 3 independent repeats. *P* values calculated using two-tailed unpaired Student *t* test.

**e** Clonogenic survival curves for H460 cells pretreated with DMSO, 500 mM sulfasalazine, 10  $\mu$ M RSL3, 10  $\mu$ M ML162, or 10  $\mu$ M FIN56 for 24 h followed by exposure to 4 Gy of ionizing radiation. The survival data were normalized to those of unirradiated control cells. Error bars are mean  $\pm$  SD, n = 3 independent repeats. *P* values calculated using two-tailed unpaired Student *t* test.

**Supplementary Figure 6. Ferroptosis is involved in ionizing radiation-induced tumor suppression *in vivo*.**

**a** Treatment schema for H460 xenograft, A549 xenograft, and lung cancer patient-derived xenograft mice.

**b** Representative images of A549 xenograft tumors with the indicated treatments at experimental endpoints.

**c** Representative images of hematoxylin and eosin and immunohistochemical staining (Ki67, phospho-H2AX, cleaved caspase-3, and 4-HNE) of H460 xenograft tumors with the indicated treatments. Scale bars, 50  $\mu$ m (insert).

**d-g** Immunohistochemistry scoring of Ki67 (d), phospho-H2AX (e), cleaved caspase-3 (f), and 4-HNE staining (g). Error bars are mean  $\pm$  SD, n = 6 randomly selected magnification fields. *P* values calculated using two-tailed unpaired Student's *t* test.

**Supplementary Table 1. Correlations between clinical pathological characteristics, radiotherapy response, and 4-HNE staining in patients with esophageal cancer.**

**Supplementary Table 2. The list of primer sequences used in this manuscript.**

sulfasalazine, 10  $\mu$ M RSL3, 10  $\mu$ M ML162, or 10  $\mu$ M FIN56 for 24 h followed by exposure to 4 Gy of ionizing radiation. Error bars are mean  $\pm$  SD, n = 3 independent repeats. *P* values calculated using two-tailed unpaired Student *t* test.

**e** Clonogenic survival curves for H460 cells pretreated with DMSO, 500 mM sulfasalazine, 10  $\mu$ M RSL3, 10  $\mu$ M ML162, or 10  $\mu$ M FIN56 for 24 h followed by exposure to 4 Gy of ionizing radiation. The survival data were normalized to those of unirradiated control cells. Error bars are mean  $\pm$  SD, n = 3 independent repeats. *P* values calculated using two-tailed unpaired Student *t* test.

**Supplementary Figure 6. Ferroptosis is involved in ionizing radiation-induced tumor suppression *in vivo*.**

**a** Treatment schema for H460 xenograft, A549 xenograft, and lung cancer patient-derived xenograft mice.

**b** Representative images of A549 xenograft tumors with the indicated treatments at experimental endpoints.

**c** Representative images of hematoxylin and eosin and immunohistochemical staining (Ki67, phospho-H2AX, cleaved caspase-3, and 4-HNE) of H460 xenograft tumors with the indicated treatments. Scale bars, 50  $\mu$ m (insert).

**d-g** Immunohistochemistry scoring of Ki67 (d), phospho-H2AX (e), cleaved caspase-3 (f), and 4-HNE staining (g). Error bars are mean  $\pm$  SD, n = 6 randomly selected magnification fields. *P* values calculated using two-tailed unpaired Student's *t* test.

**Supplementary Table 1. Correlations between clinical pathological characteristics, radiotherapy response, and 4-HNE staining in patients with esophageal cancer.**

**Supplementary Table 2. The list of primer sequences used in this manuscript.**

**Fig. S2**

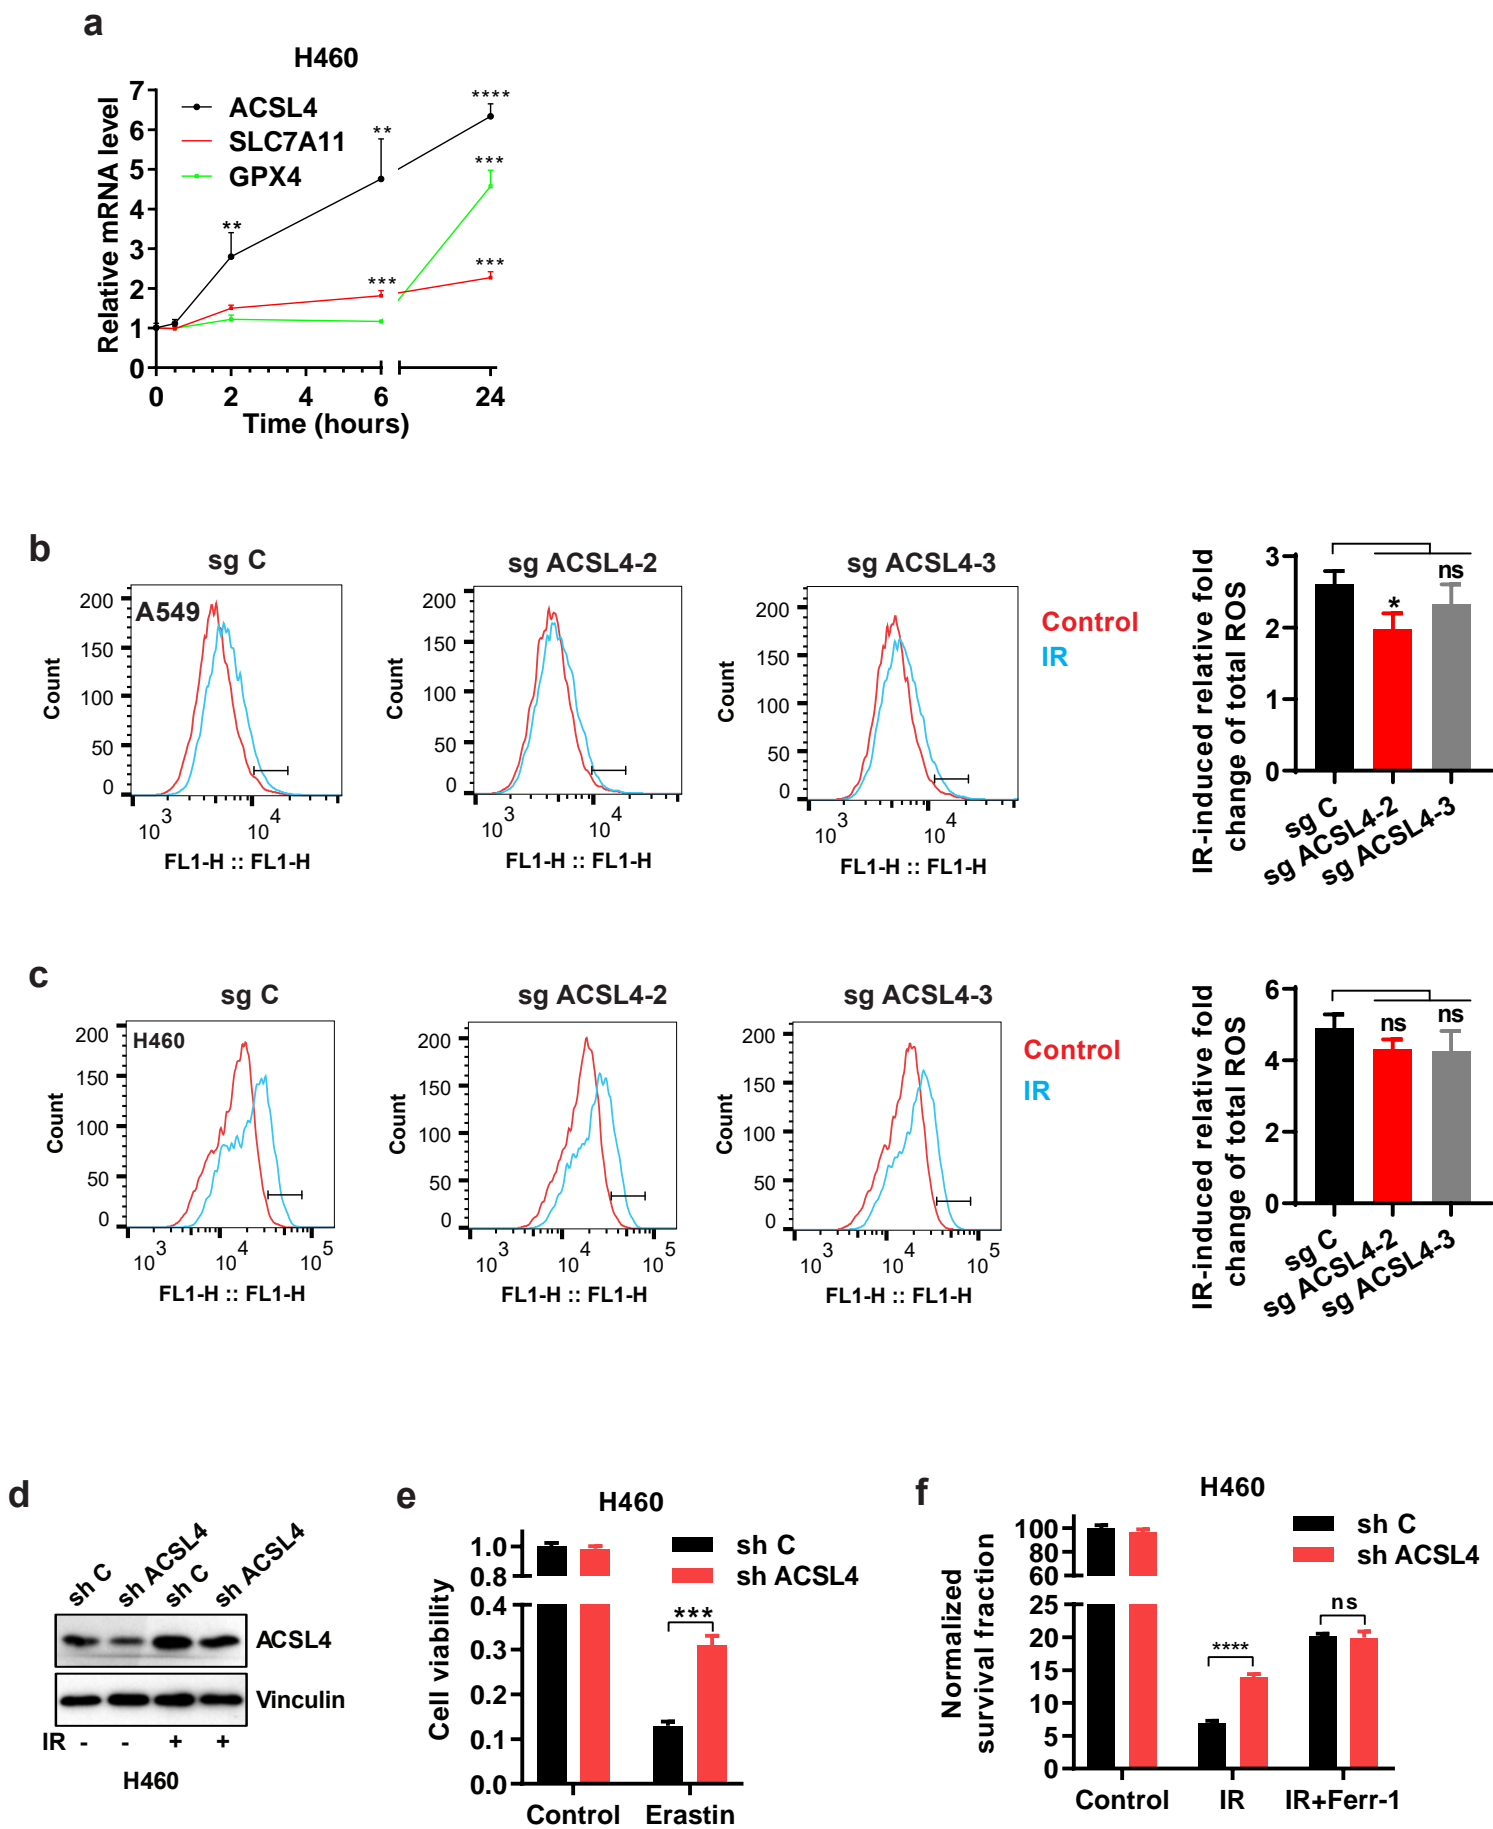



**Fig. S3**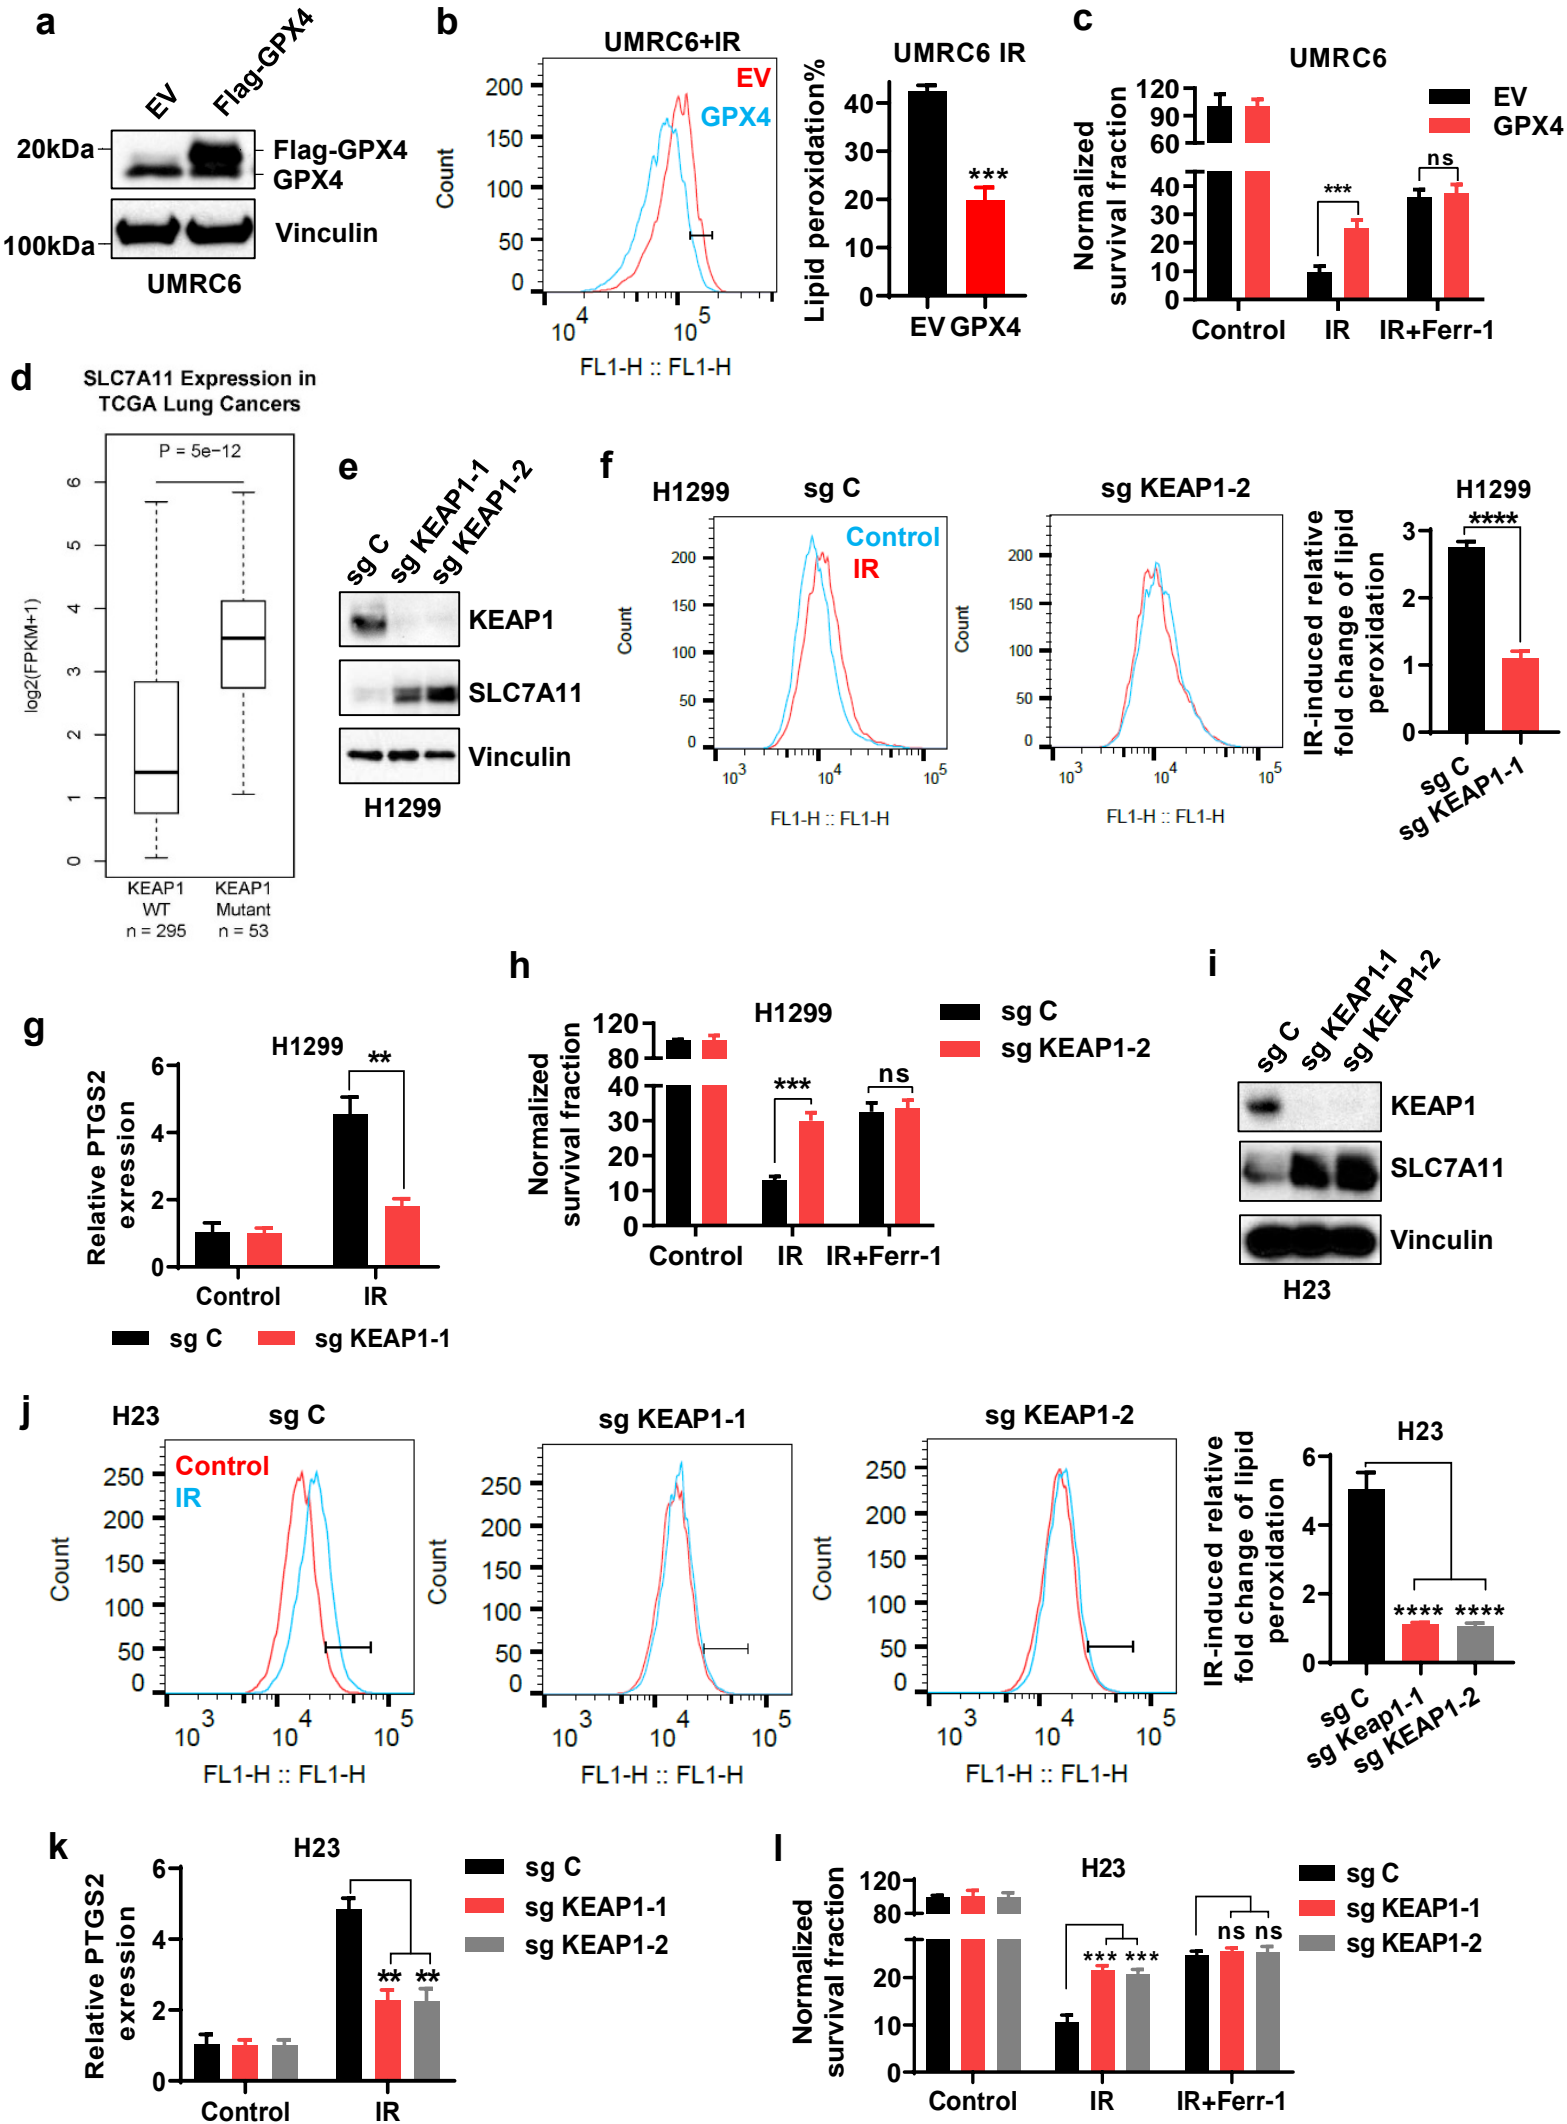

**Fig. S4**

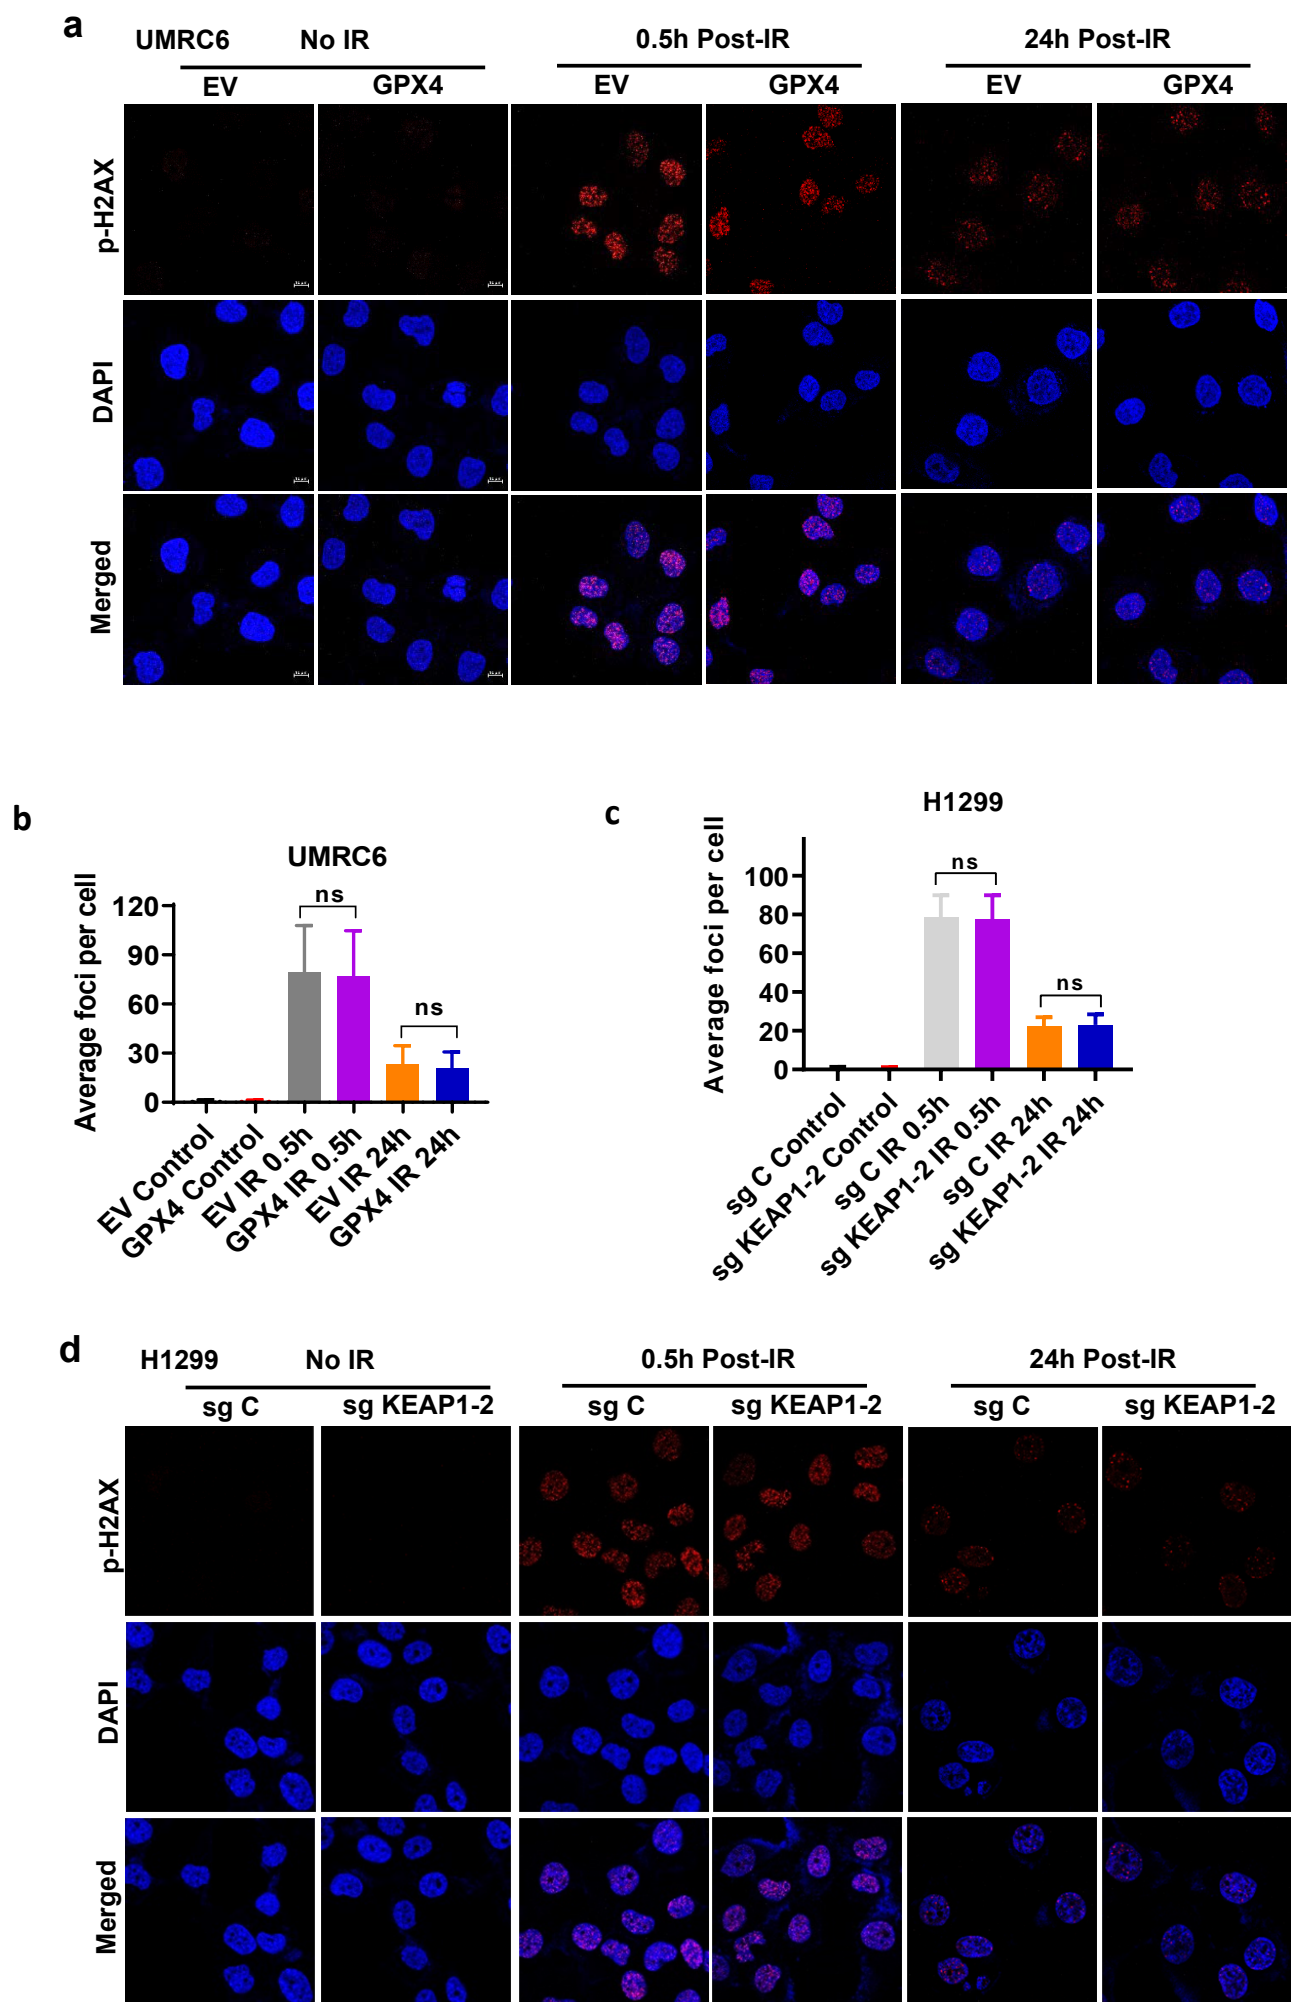

**Fig. S5**

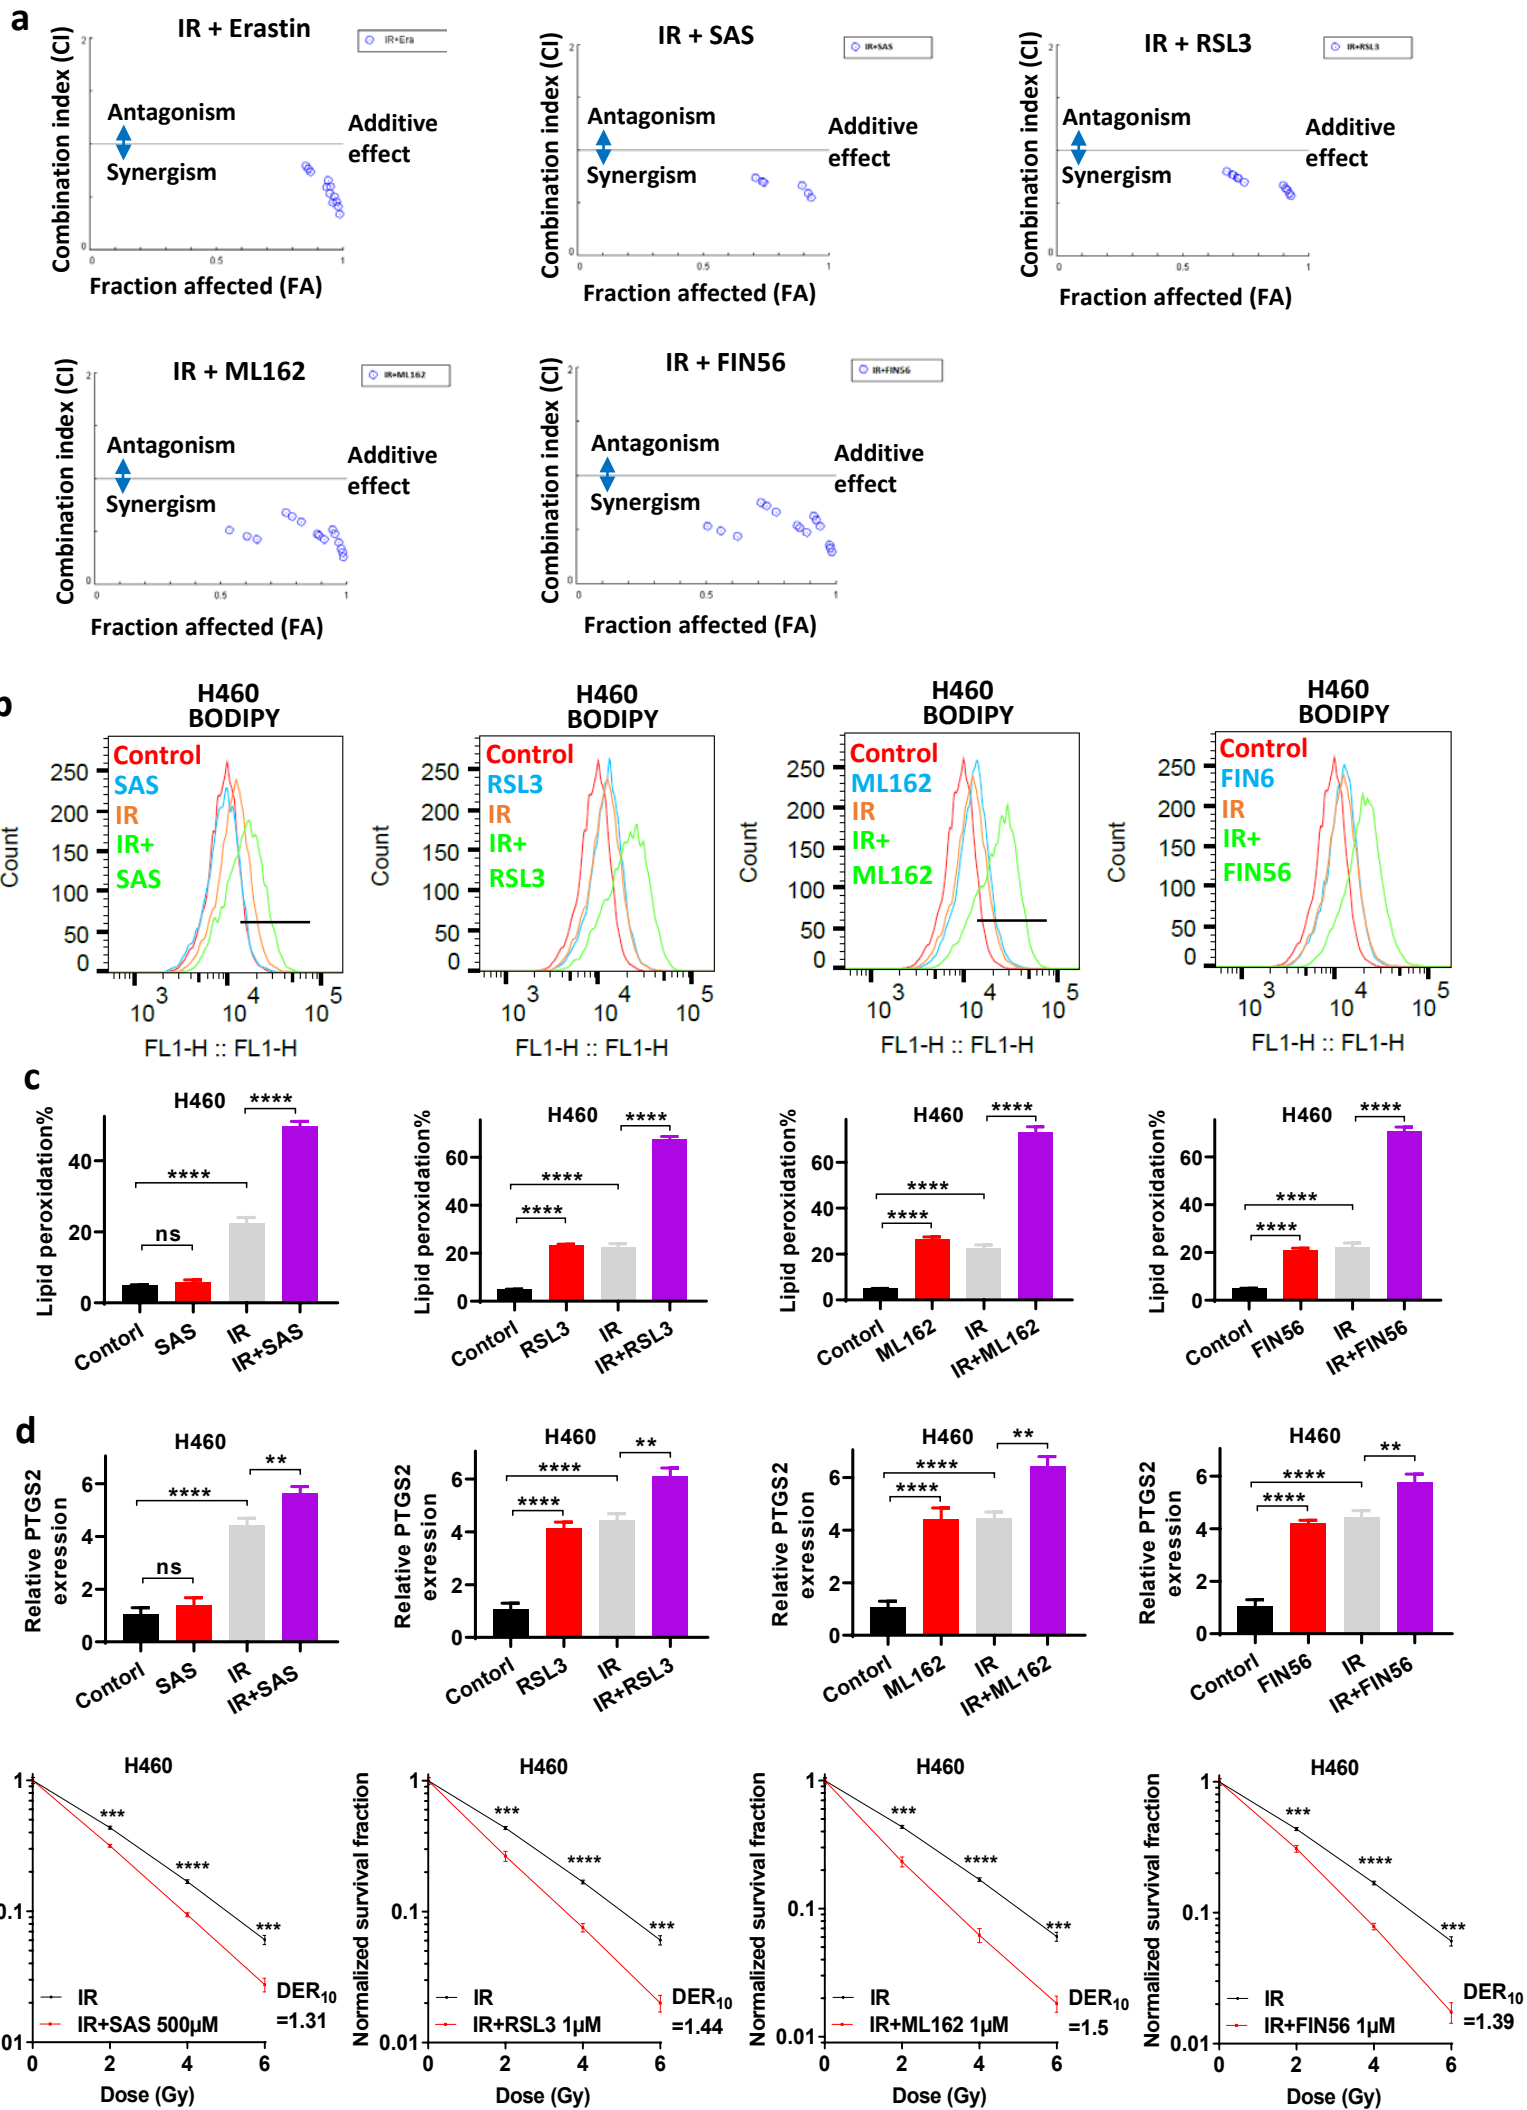

**Fig. S6**

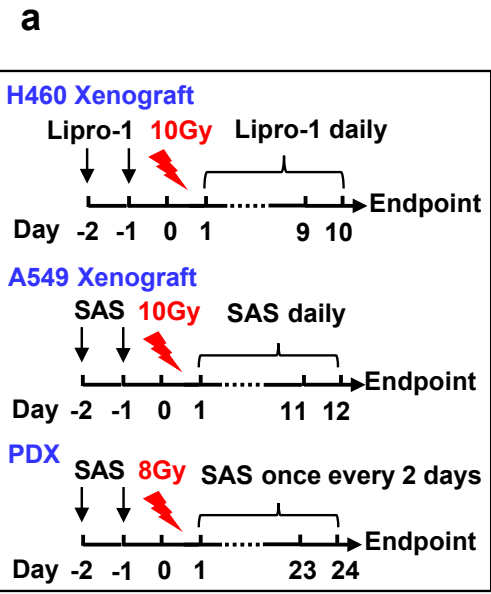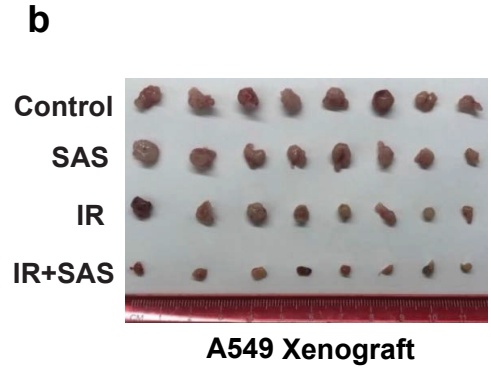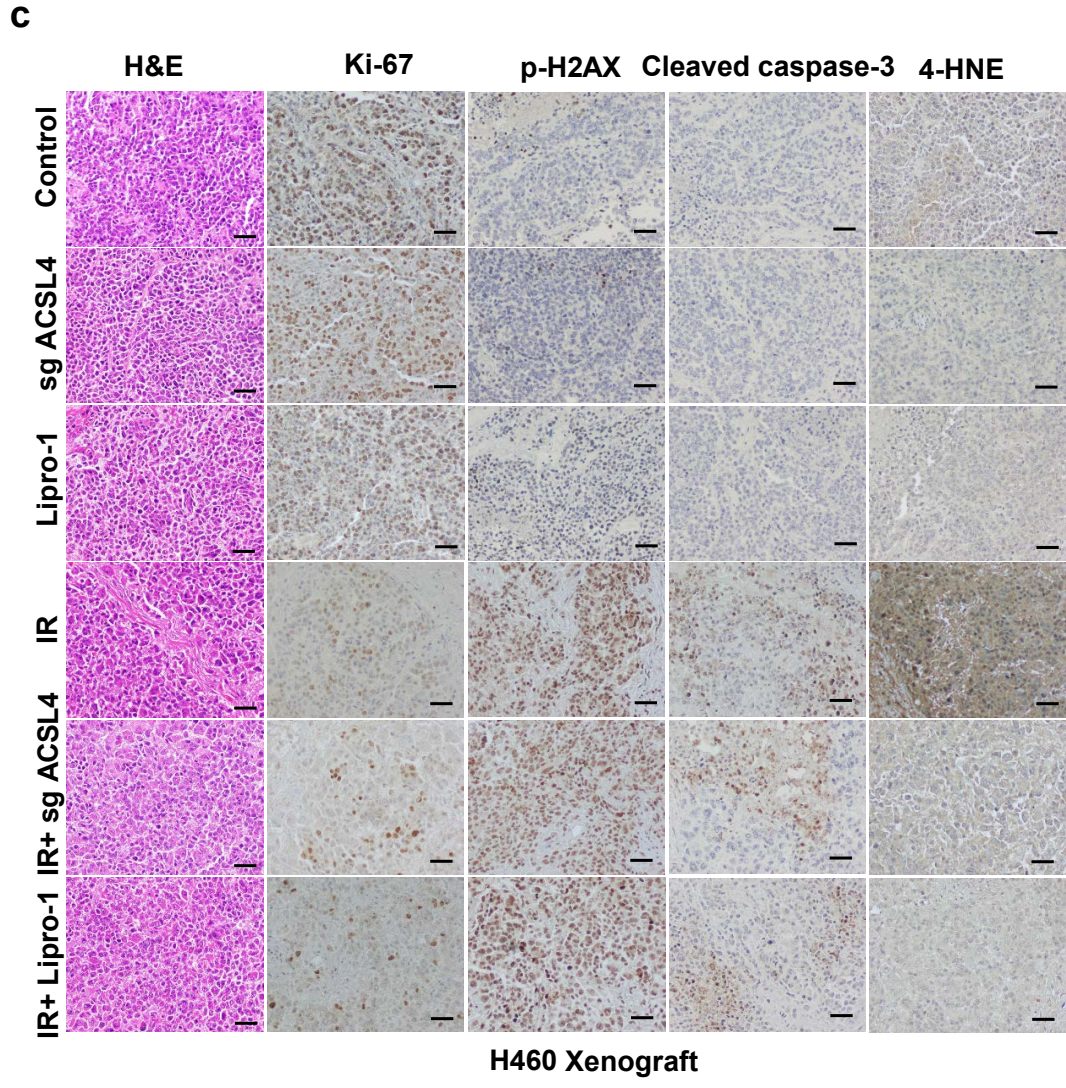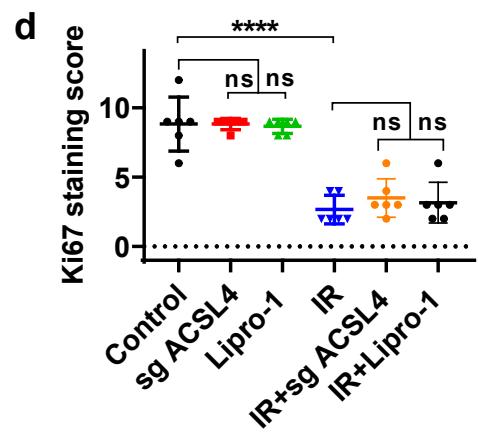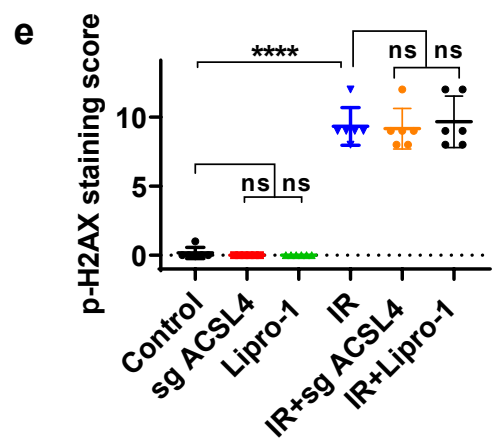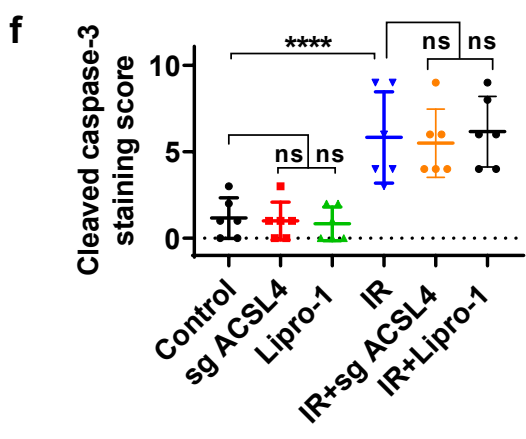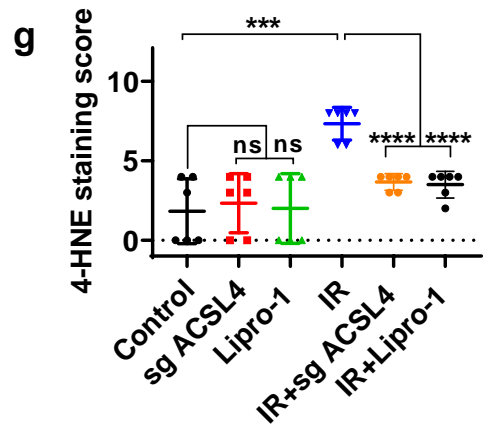

Supplement: 41422_2019_263_MOESM1_ESM.pdf [file 41422_2019_263_MOESM1_ESM.pdf]
